# Supplementary material for: First days at sea: depicting migration patterns of juvenile seabirds in highly impacted seascapes
Source: PeerJ. 2021 May 11;9:e11054. doi: 10.7717/peerj.11054 (PMC8121070; doi:10.7717/peerj.11054)
Supplement: Supplemental Information 1 [file peerj-09-11054-s001.xls]

## Sheet: location balearic%09shearwaters
Id_FT	Date	y	x	Class	Speed	Heading	Average_Speed	Average_Heading	cycle
110367	2012-06-17 15:01:11	38.945	1.214	B
110367	2012-06-17 15:20:44	38.91	1.251	1			15.46	140
110367	2012-06-17 16:41:17	38.945	1.214	1			3.75	320
110367	2012-07-01 12:59:05	38.852	0.387	0			0.22	262	1
110367	2012-07-01 14:22:19	38.859	0.722	A			20.92	88	1
110367	2012-07-01 14:47:15	38.926	0.853	B			32.65	56	1
110367	2012-07-01 16:03:05	38.908	0.952	B			6.96	103	1
110367	2012-07-01 18:44:00	38.849	1.005	B			2.98	145	1
110367	2012-07-01 18:46:00	38.922	0.598	A			1 084.52	283	1
110367	2012-07-03 17:56:33	38.922	-0.048	B			1.18	270	2
110367	2012-07-06 05:30:05	36.575	-3.456	B			6.67	229	3
110367	2012-07-06 06:03:08	36.7	-3.667	0			42.48	306	3
110367	2012-07-06 06:03:08	36.701	-3.671	1			0	287	3
110367	2012-07-06 09:35:00	36.576	-4.417	0			19.26	258	3
110367	2012-07-06 10:35:31	36.517	-4.536	1			12.39	238	3
110367	2012-07-08 09:12:31	37.088	-9.937	B			10.4	279	4
110367	2012-07-08 09:37:27	37.218	-9.847	0			39.73	28	4
110367	2012-07-08 09:54:38	37.24	-9.691	0			48.98	79	4
110367	2012-07-08 10:50:02	37.36	-9.539	A			20.52	45	4
110367	2012-07-08 11:35:00	37.437	-9.498	B			12.4	22	4
110367	2012-07-08 15:10:15	37.717	-9.043	2			14.15	52	4
110367	2012-07-08 16:36:04	37.813	-9.027	1			7.53	7	4
110367	2012-07-08 18:12:05	37.894	-8.816	0			12.87	64	4
110367	2012-07-10 22:10:55	40.048	-6.861	B			5.64	34	5
110368	2012-06-16 17:05:21	38.928	1.288	A
110368	2012-06-16 17:56:46	38.925	1.287	B			0.4	194
110368	2012-06-16 19:38:57	39.012	1.148	B			9.06	308
110368	2012-06-16 19:58:04	39.001	1.157	B			4.55	147
110368	2012-06-16 20:25:25	38.943	1.215	A			17.92	142
110368	2012-06-16 22:07:52	38.963	1.199	B			1.53	328
110368	2012-06-17 02:16:45	38.975	1.137	B			1.33	283
110368	2012-06-17 02:25:36	38.957	1.193	B			35.52	112
110368	2012-07-06 17:20:49	38.787	0.511	0			0.13	252	1
110368	2012-07-06 18:26:54	38.639	0.469	0			15.3	192	1
110368	2012-07-06 19:17:56	38.57	0.356	1			14.65	232	1
110368	2012-07-06 20:04:57	38.547	0.332	A			4.21	219	1
110368	2012-07-06 20:13:02	38.523	0.306	B			25.96	220	1
110368	2012-07-06 21:55:35	38.515	0.307	B			0.52	174	1
110368	2012-07-09 01:55:51	37.087	-1.638	A			4.49	227	2
110368	2012-07-09 03:15:31	37.023	-1.692	B			6.46	213	2
110368	2012-07-09 03:35:31	37.027	-1.682	B			2.98	63	2
110368	2012-07-09 04:47:12	36.962	-1.669	B			6.13	170	2
110368	2012-07-09 06:26:46	36.404	-2.287	0			50.01	221	2
110368	2012-07-09 07:33:28	36.266	-2.434	B			18.19	220	2
110368	2012-07-09 08:58:27	36.225	-3.059	0			39.7	265	2
110368	2012-07-09 09:13:47	36.231	-3.072	B			5.26	299	2
110369	2012-06-17 13:40:33	38.944	1.238	2
110369	2012-06-17 13:50:04	38.943	1.241	A			1.78	113
110369	2012-06-17 15:19:36	39.002	1.198	0			5.05	330
110369	2012-06-17 16:39:01	38.896	1.142	0			9.63	202
110369	2012-07-01 20:18:57	39.018	0.392	B			0.2	282	1
110369	2012-07-01 20:20:56	39.018	0.392	B			0	0	1
110369	2012-07-01 21:59:27	39.019	0.376	B			0.84	274	1
110369	2012-07-06 08:47:46	37.357	-1.603	0			2.37	223	2
110369	2012-07-06 09:33:50	37.185	-1.677	1			26.33	198	2
110369	2012-07-06 10:34:47	36.791	-1.919	0			48.04	206	2
110369	2012-07-06 11:17:13	36.703	-1.985	B			16.14	211	2
110369	2012-07-08 13:28:17	36.256	-5.103	0			5.64	260	3
110369	2012-07-08 15:08:54	36.253	-5.102	B			0.21	164	3
110369	2012-07-08 16:30:43	35.685	-5.158	A			46.46	184	3
110369	2012-07-08 16:33:07	35.959	-5.07	0			787.09	14	3
110369	2012-07-08 18:09:23	36.215	-5.049	0			17.78	3	3
110369	2012-07-13 07:42:51	37.159	-9.196	0			3.51	287	4
110369	2012-07-13 09:26:16	37.156	-9.195	B			0.2	165	4
110369	2012-07-13 09:53:47	37.159	-9.196	B			0.75	345	4
110369	2012-07-13 11:29:13	36.979	-9.31	0			14.1	206	4
110370	2012-06-17 07:58:21	38.938	1.252	A
110370	2012-06-17 15:21:16	38.92	1.249	2			0.27	187
110370	2012-07-01 22:02:24	38.327	-0.018	B			0.37	239	1
110370	2012-07-02 04:21:19	37.964	-0.592	B			10.2	231	2
110370	2012-07-02 04:30:12	37.958	-0.58	B			8.41	122	2
110370	2012-07-04 05:12:12	36.75	-7.091	B			12.13	258	3
110370	2012-07-04 07:55:14	36.919	-7.013	2			7.37	20	3
110370	2012-07-06 08:46:55	36.398	-7.519	A			1.5	218	4
110370	2012-07-06 09:34:46	36.48	-7.458	A			13.32	30	4
110370	2012-07-06 10:36:02	36.491	-7.13	0			28.74	87	4
110370	2012-07-06 11:14:03	36.516	-7.048	B			12.37	69	4
110370	2012-07-06 15:09:51	36.647	-6.572	B			11.43	70	4
110370	2012-07-06 15:38:59	36.678	-6.501	B			14.85	61	4
110370	2012-07-08 16:35:46	36.73	-6.346	1			0.31	67	5
110371	2012-06-17 08:00:24	38.859	1.21	B
110371	2012-06-17 08:23:50	38.958	1.382	B			47.4	53
110371	2012-06-17 08:51:09	38.92	1.352	A			10.89	211
110371	2012-06-17 09:38:45	38.933	1.351	B			1.83	356
110371	2012-06-17 10:03:39	38.947	1.201	0			31.48	276
110371	2012-06-17 10:28:46	38.975	1.159	0			11.43	310
110371	2012-06-17 13:39:23	38.949	1.279	0			3.39	105
110371	2012-06-17 13:49:10	38.912	1.288	A			25.68	169
110371	2012-06-17 15:00:50	38.92	1.267	B			1.69	296
110371	2012-06-17 15:19:48	38.931	1.218	0			13.96	286
110371	2012-07-06 09:36:30	39.293	0.739	1			0.13	314	1
110371	2012-07-06 13:50:15	39.37	0.798	B			2.35	30	1
110371	2012-07-06 15:14:41	39.376	0.788	B			0.77	307	1
110371	2012-07-06 17:21:04	39.401	0.773	B			1.45	335	1
110371	2012-07-06 18:26:35	39.402	0.78	B			0.56	79	1
110371	2012-07-08 19:19:37	39.636	0.356	B			0.91	305	2
110371	2012-07-08 21:13:19	39.64	0.338	1			0.85	286	2
110371	2012-07-11 05:42:57	39.21	0.465	B			0.87	167	3
110371	2012-07-13 04:11:11	39.022	-0.03	A			1.02	244	4
110371	2012-07-13 04:51:13	39.018	-0.036	B			1.02	229	4
110371	2012-07-13 07:44:50	38.959	-0.068	B			2.46	202	4
110371	2012-07-13 09:51:23	39.015	-0.106	A			3.34	332	4
110371	2012-07-15 13:55:34	38.979	0.038	B			0.25	107	5
110371	2012-07-15 15:17:16	38.983	0.068	B			1.93	80	5
110371	2012-07-15 17:03:50	38.95	0.023	1			3.01	226	5
110371	2012-07-17 19:06:08	39.022	0.043	B			0.16	12	6
